# Supplementary material for: Immune mediated inflammatory diseases: moving from targeted biologic therapy, stem cell therapy to targeted cell therapy
Source: Frontiers journal article supplement (doi:10.3389/fimmu.2025.1520063), 2025-04-07
Supplement: Data_Sheet_1.pdf [file Data_Sheet_1.pdf]

## Supplementary Materials

### Immune mediated inflammatory diseases: moving from targeted biologic therapy, stem cell therapy to targeted cell therapy

**Table S1.** Clinical trials using CAR-T therapy for immune mediated inflammatory diseases

| NCT Number                          | Study Title                                                                                                                                                     | Interventions                                               |
|-------------------------------------|-----------------------------------------------------------------------------------------------------------------------------------------------------------------|-------------------------------------------------------------|
| <b>Systemic Lupus Erythematosus</b> |                                                                                                                                                                 |                                                             |
| NCT05765006                         | CD19-CART(Relma-cel) for Moderate to Severe Active Systemic Lupus Erythematosus                                                                                 | BIOLOGICAL: Relma-cel                                       |
| NCT05030779                         | A Study of CD19/BCMA Chimeric Antigen Receptor T Cells Therapy for Patients With Refractory Systemic Lupus Erythematosus                                        | BIOLOGICAL: Assigned Interventions<br>CD19/BCMA CAR T-cells |
| NCT05474885                         | BCMA-CD19 cCAR T Cell Treatment of Relapsed/Refractory Systemic Lupus Erythematosus (SLE)                                                                       | BIOLOGICAL: BCMA-CD19 cCAR T cells                          |
| NCT05846347                         | Phase I Clinical Study of GC012F Injection in Treatment of Refractory Systemic Lupus Erythematosus                                                              | DRUG: GC012F injection                                      |
| NCT05859997                         | Universal CAR-T Cells (BRL-301) in Relapse or Refractory Autoimmune Diseases                                                                                    | BIOLOGICAL: BRL-301                                         |
| NCT05869955                         | A Study of CC-97540 in Participants With Severe, Refractory Systemic Lupus Erythematosus (SLE)                                                                  | DRUG: CC-97540 DRUG: Fludarabine DRUG: Cyclophosphamide     |
| NCT05085418                         | A Study of CD19/BCMA Chimeric Antigen Receptor T Cells Therapy for Patients With Refractory Immune Nephritis                                                    | BIOLOGICAL: Assigned Interventions<br>CD19/BCMA CAR T-cells |
| NCT05858684                         | Dual Target CAR-T Cell Treatment for Refractory Systemic Lupus Erythematosus (SLE) Patients                                                                     | DRUG: GC012F injection                                      |
| NCT03030976                         | A Study of CD19 Redirected Autologous T Cells for CD19 Positive Systemic Lupus Erythematosus (SLE)                                                              | DRUG: cyclophosphamide DRUG: anti-CD19-CAR-T cells          |
| NCT05938725                         | A Study of Anti-CD19 Chimeric Antigen Receptor T Cell Therapy for Subjects With Refractory Lupus Nephritis                                                      | Biological: KYV-101 anti-CD19 CAR-T cell therapy            |
| NCT05798117                         | The study is intended to assess safety, efficacy and cellular kinetics of YTB323 treatment in participants with severe refractory systemic lupus erythematosus. | Single Group Assignment                                     |
| NCT05930314                         | CNCT19 Cell Injection for Refractory Systemic Lupus Erythematosus                                                                                               | Refractory Systemic Lupus Erythematosus                     |
| NCT06222853                         | Study of Therapeutic Efficacy of Anti-CD19 CAR-T Cells in Children With Refractory Systemic Lupus Erythematosus                                                 | Biological: anti-CD19-CAR-T cells                           |
| NCT05988216                         | Universal CAR-T Cells (BRL-301) in Refractory Systemic Lupus Erythematosus                                                                                      | Biological: BRL-301                                         |
| NCT06150651                         | Safety of PiggyBac Transposon CAR T-cells Targeting CD-19 in Refractory Lupus.                                                                                  | Other: CAR T-cell therapy                                   |

|                             |                                                                                                                                              |                                                                 |
|-----------------------------|----------------------------------------------------------------------------------------------------------------------------------------------|-----------------------------------------------------------------|
| NCT06310811                 | Anti-CD19 CAR-T Cell Therapy in Participants With Moderate to Severe Active Systemic Lupus Erythematosus                                     | Drug: RD06-04 Cells injection                                   |
| NCT06106893                 | A Clinical Study of CD19 Universal CAR- $\gamma\delta$ T Cells in Refractory/Moderate-to-severe Systemic Lupus Erythematosus                 | Biological: CD19 Universal CAR- $\gamma\delta$ T Cells          |
| NCT06038474                 | Descartes-08 for Patients With Systemic Lupus Erythematosus (SLE-001)                                                                        |                                                                 |
| NCT06153095                 | A Study of IMPT-514 in Active Refractory Systemic Lupus Erythematosus (SLE)                                                                  | Biological: IMPT-514                                            |
| NCT06121297                 | RESET-SLE: A Phase 1/2 Open-Label Study to Evaluate the Safety and Efficacy of CABA-201 in Subjects With Active Systemic Lupus Erythematosus | Biological: CABA-201                                            |
| NCT06294236                 | Study Evaluating SC291 in Subjects With Severe r/r B-cell Mediated Autoimmune Diseases (GLEAM)                                               | Biological: SC291                                               |
| <b>Sjogren's Syndrome</b>   |                                                                                                                                              |                                                                 |
| NCT05085431                 | A Study of CD19/BCMA Chimeric Antigen Receptor T Cells Therapy for Patients With Refractory Sjogren's Syndrome                               | BIOLOGICAL: Assigned Interventions<br>CD19/BCMA CAR T-cells     |
| <b>Scleroderma</b>          |                                                                                                                                              |                                                                 |
| NCT05085444                 | A Study of CD19/BCMA Chimeric Antigen Receptor T Cells Therapy for Patients With Refractory Scleroderma                                      | BIOLOGICAL: Assigned Interventions<br>CD19/BCMA CAR T-cells     |
| NCT05869955                 | A Study of CC-97540, CD-19-Targeted Nex-T CAR T Cells, in Participants With Severe, Refractory Autoimmune Diseases                           | Drug: CC-97540/Drug: Fludarabine/Drug: Cyclophosphamide         |
| NCT06152172                 | CARTIMMUNE: Study of Patients With Autoimmune Diseases Receiving KYV-101 (CARTIMMUNE)                                                        | Drug: KYV-101/Drug: Cyclophosphamide/Drug: Fludarabine          |
| <b>Pemphigus Vulgaris</b>   |                                                                                                                                              |                                                                 |
| NCT04422912                 | Open-label Study to Determine the Maximum Tolerated Dose of DSG3-CAART in Mucosal-dominant PV Patients (mPV)                                 | BIOLOGICAL: DSG3-CAART                                          |
| <b>Neuromyelitis optica</b> |                                                                                                                                              |                                                                 |
| NCT05828212                 | Evaluate the Safety and Efficacy of CAR-T Cells in the Treatment of R/R Neuromyelitis Optica                                                 | DRUG: CD19 CAR-T cells injection                                |
| NCT03605238                 | Treatment of Relapsed and/or Refractory AQP4-IgG Seropositive NMOSD by Tandem CAR T Cells Targeting CD19 and CD20                            | BIOLOGICAL: Corticosteroids & tanCART19/20                      |
| NCT04561557                 | Safety and Efficacy of CT103A Cells for Relapsed/Refractory Antibody-associated Idiopathic Inflammatory Diseases of the Nervous System       | BIOLOGICAL: CT103A cells DRUG: Cyclophosphamide and fludarabine |
| <b>Myasthenia Gravis</b>    |                                                                                                                                              |                                                                 |
| NCT05451212                 | Open-label Study to Evaluate the Safety of Various Dosing Regimens of MuSK-CAART for MuSK Myasthenia Gravis                                  | BIOLOGICAL: MuSK-CAART                                          |

|                                                    |                                                                                                                                                                                                      |                                                                 |
|----------------------------------------------------|------------------------------------------------------------------------------------------------------------------------------------------------------------------------------------------------------|-----------------------------------------------------------------|
| NCT05828225                                        | Evaluate the Safety and Efficacy of CAR-T Cells in the Treatment of Refractory Myasthenia Gravis                                                                                                     | DRUG: CD19 CAR-T cells injection                                |
| NCT04146051                                        | Descartes-08 CAR-T Cells in Generalized Myasthenia Gravis (MG)                                                                                                                                       | DRUG: Descartes-08                                              |
| NCT04561557                                        | Safety and Efficacy of CT103A Cells for Relapsed/Refractory Antibody-associated Idiopathic Inflammatory Diseases of the Nervous System                                                               | BIOLOGICAL: CT103A cells DRUG: Cyclophosphamide and fludarabine |
| NCT06193889                                        | A Study of Anti-CD19 Chimeric Antigen Receptor T-Cell Therapy, in Subjects With Refractory Generalized Myasthenia Gravis                                                                             | Biological: KYV-101/Drug: Standard lymphodepletion regimen      |
| <b>Autoimmune Diseases</b>                         |                                                                                                                                                                                                      |                                                                 |
| NCT05239702                                        | Clinical Study of Targeting CD7 CAR-T Cells in the Treatment of Autoimmune Diseases                                                                                                                  | BIOLOGICAL: CD7 CAR T-cells                                     |
| NCT05263817                                        | A Clinical Study of CD19/BCMA CAR-T Cells in the Treatment of Refractory POEMS Syndrome, Amyloidosis, Autoimmune Hemolytic Anemia, and Vasculitis                                                    | BIOLOGICAL: CD19/BCMA CAR T-cells                               |
| NCT05459870                                        | CAR-T Cells Targeting B Cell Related Autoimmune Diseases                                                                                                                                             | Single Group Assignment                                         |
| NCT06279923                                        | CD19-BAFF CAR-T Cells Therapy for Patients With Autoimmune Diseases                                                                                                                                  | Biological: CD19-BAFF Targeted CAR T-cells                      |
| NCT06056921                                        | Safety and Efficacy of CD19 Targeted CAR-T Therapy for Refractory Autoimmune Disease                                                                                                                 | Biological: CD19 targeted CAR-T cells                           |
| <b>Inflammatory Diseases of the Nervous System</b> |                                                                                                                                                                                                      |                                                                 |
| NCT04561557                                        | An Open Label Clinical Trial to Evaluate the Safety and Efficacy of CT103A Cells for the Treatment of Relapsed/Refractory Antibody-associated Idiopathic Inflammatory Diseases of the Nervous System | Sequential Assignment                                           |

**Table S2.** Recent meeting abstract using CAR-T therapy for immune mediated inflammatory diseases

| First author              | Year | Disease                            | Recognition domain | Carrier cells | Target cells      | Clinical study   | Dosage                  | Persistence |
|---------------------------|------|------------------------------------|--------------------|---------------|-------------------|------------------|-------------------------|-------------|
| Abstract (ACR 2023)       |      |                                    |                    |               |                   |                  |                         |             |
| Christina Bergmann        | 2023 | Systemic sclerosis                 | CD19 scFv          | CAR T         | CD19+B cells      | In vivo          |                         |             |
| Josefina Cortés Hernández | 2023 | SLE                                | CD19 scFv          | CAR T         | CD19+B cells      | In vivo          | 12.5*10^6               | 28 days     |
| Georg Schett              | 2023 | SLE                                | CD19 scFv          | CAR T         | CD19+B cells      | In vivo          | 1.0*10^6/kg             | 14 months   |
| Jérôme Avouac             | 2023 | Systemic sclerosis                 | CD19 scFv          | CAR T         | CD20+CD19+B cells | In vivo          | 20*10^6                 | 6 weeks     |
| Jule Taubmann             | 2023 | Refractory Antisynthetase Syndrome | CD19 scFv          | CAR T         | CD19+B cells      | In vivo          |                         |             |
| Yong Yuan                 | 2023 |                                    | CD19 scFv          | cCAR          | BCMA-CD19+B cells | In vivo          | 1.5-3x10^6/kg           | 6 months    |
| Abstract (EULAR 2024)     |      |                                    |                    |               |                   |                  |                         |             |
| Y. Ma.                    | 2024 | SLE Refractory                     |                    | cCAR          |                   | In vivo          | 3*10^6/kg               | 150 days    |
| J. Taubmann               | 2024 | Antisynthetase Syndrome            | CD19 scFv          | CAR T         | CD19+B cells      | In vivo          | 1.0*10^6 CAR T cells/kg | 18 months   |
| J. Auth                   | 2024 | Systemic sclerosis                 | CD19 scFv          | CAR T         | CD19+B cells      | In vivo          | 1.0*10^6 CAR T cells/kg | 3-4 months  |
| G. Schett                 | 2024 | Rheumatic disease                  | CD19 scFv          | CAR T         | CD19+B cells      | In vivo          | 1.0*10^6/kg             | 6 weeks     |
| J. Cortés-Hernández       | 2024 | SLE                                | CD19 scFv          | CAR T         | CD19+B cells      | In vivo          | 12.5*10^6               |             |
| L. Bucc                   | 2024 | Autoimmune disease                 | CD19 scFv          | CAR T         | CD19+B cells      | In vivo          |                         | 4 months    |
| R. Nicolai                | 2024 | Rheumatic disease                  | CD19 scFv          | CAR T         | CD19+B cells      | In vivo          |                         |             |
| S. Albani                 | 2024 | Autoimmune disease                 |                    | CAR Treg      |                   | in vitro/In vivo |                         |             |
| A. Mahne                  | 2024 | Autoimmune disease                 | CD19 scFv          | CAR T         | CD19+B cells      | In vivo          |                         |             |

|                            |      |                    |           |          |              |                  |             |          |
|----------------------------|------|--------------------|-----------|----------|--------------|------------------|-------------|----------|
| J. Chou                    | 2024 | Autoimmune disease | CD19 scFv | CAR T    | CD19+B cells | In vivo          |             |          |
| J. Henes                   | 2024 | Systemic sclerosis | CD19 scFv | CAR T    | CD19+B cells | In vivo          |             |          |
| C. Bracaglia               | 2024 | SLE                | CD19 scFv | CAR T    | CD19+B cells | In vivo          | 1.0*10^6/kg | 3 months |
| <b>Abstract (EHA 2024)</b> |      |                    |           |          |              |                  |             |          |
| M Doglio                   | 2024 | SLE                | CD19 scFv | CAR Treg | CD19+B cells | in vitro/In vivo | 3.5 × 10^6  | 8 weeks  |

---
